# Supplementary material
Source: PubMed Central journal article supplement (PMC5846100)

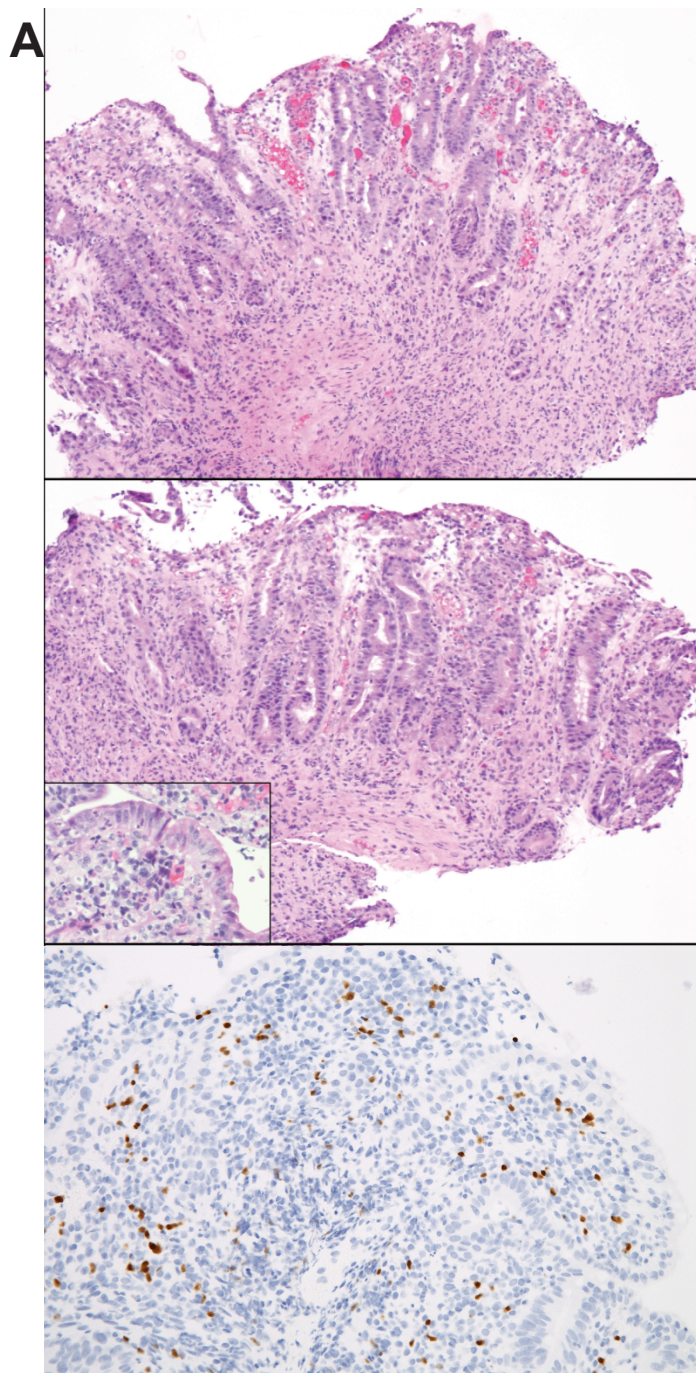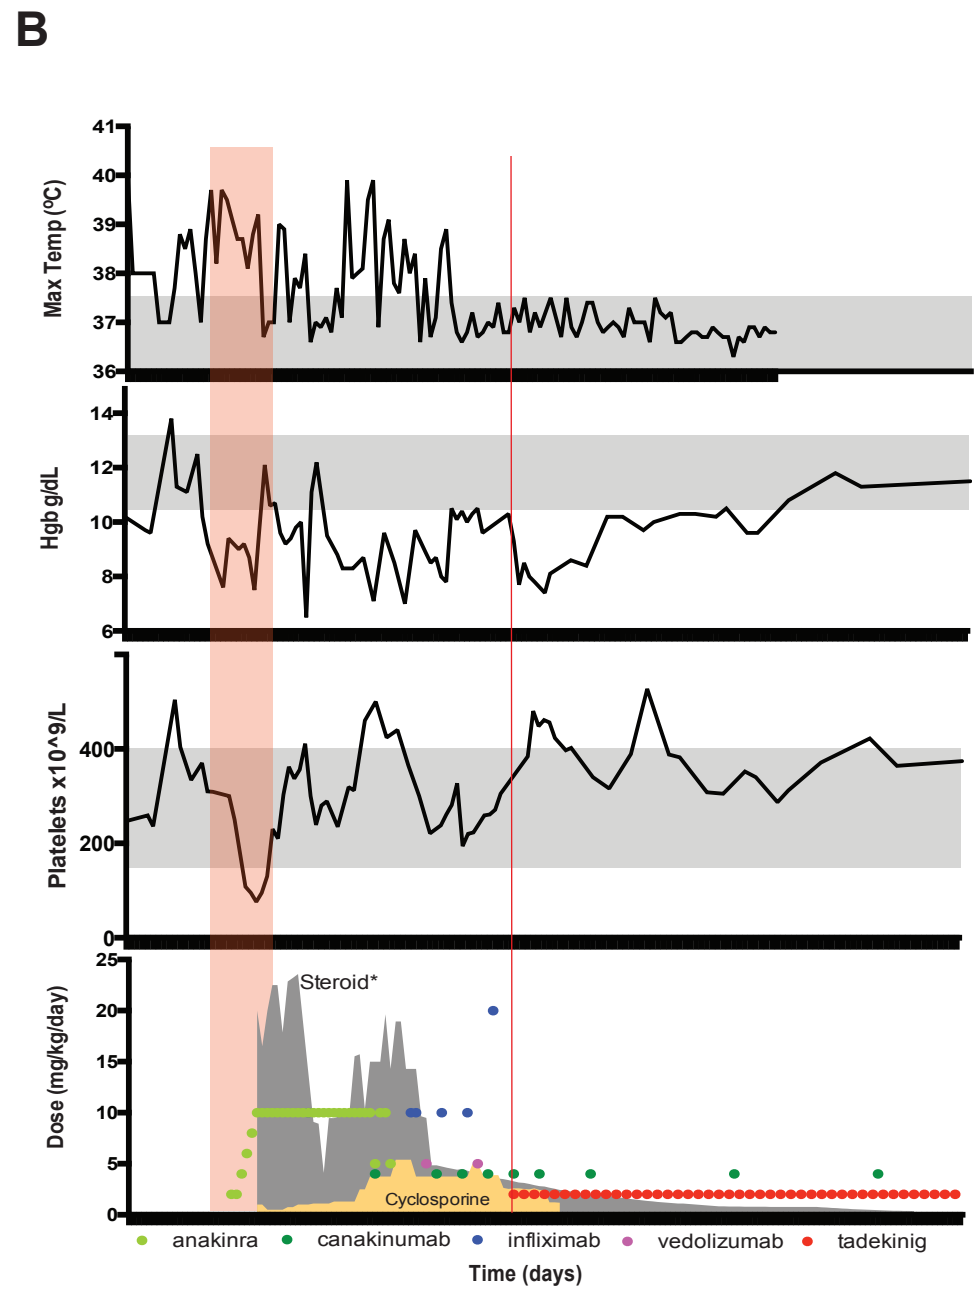

Supplement: NIHMS838477-supplement-3.pdf [file NIHMS838477-supplement-3.pdf]
